# Supplementary material for: Cold Dispase Digestion of Murine Lungs Improves Recovery and Culture of Airway Epithelial Cells
Source: Preprints.org preprint supplement (doi:10.20944/preprints202307.0769.v1), 2023-07-12
Supplement: Supplementary file 1 [file supplementary]

# Cold dispase digestion of murine lungs improves recovery and culture of airway epithelial cells

**Piotr P Janas<sup>1</sup>, Caroline Chauché<sup>1</sup>, Patrick Shearer<sup>2</sup>, Georgia Perona-Wright<sup>2</sup>, Henry J McSorley<sup>3</sup> and Jürgen Schwarze<sup>1\*</sup>**

<sup>1</sup> Centre for Inflammation Research, The Queens Medical Research Institute, The University of Edinburgh, Edinburgh BioQuarter, Edinburgh, EH16 4TJ, United Kingdom

<sup>2</sup> Institute of Infection, Immunity & Inflammation, University of Glasgow, Glasgow, G12 8TA, United Kingdom

<sup>3</sup> Division of Cell Signalling and Immunology, School of Life Sciences, University of Dundee, Dundee, DD1 5AA, United Kingdom.

Corresponding author: Jürgen Schwarze, [Jurgen.Schwarze@ed.ac.uk](mailto:Jurgen.Schwarze@ed.ac.uk)

## Supplementary data

MHC-I

MHC-II

CD24

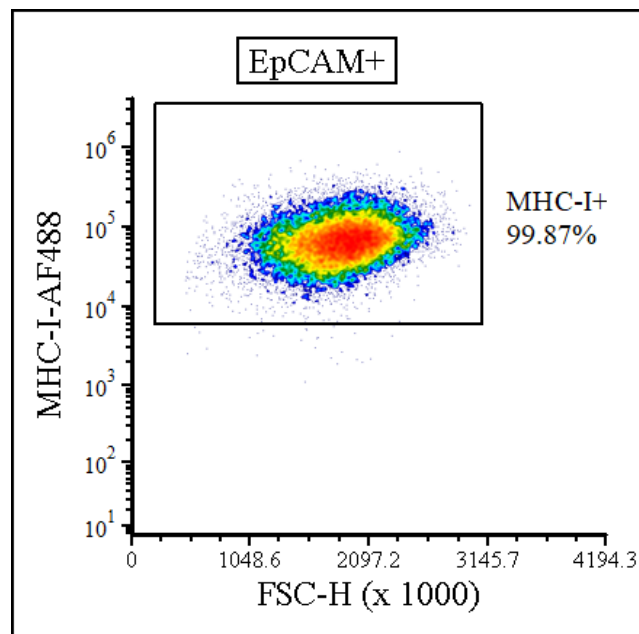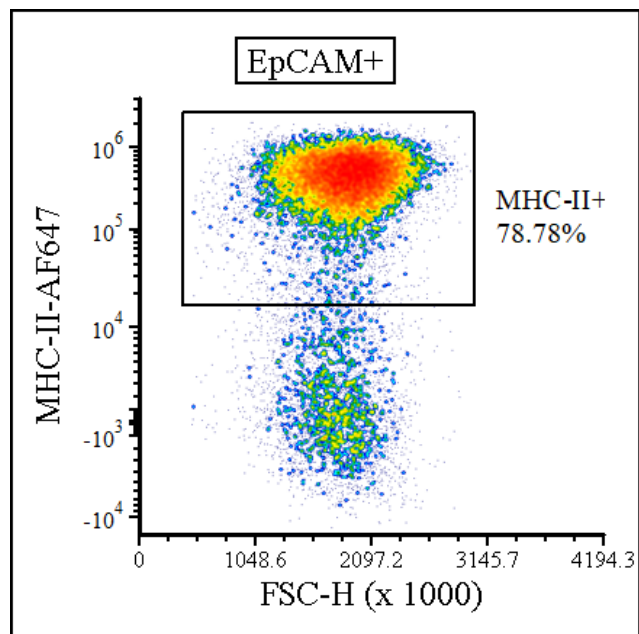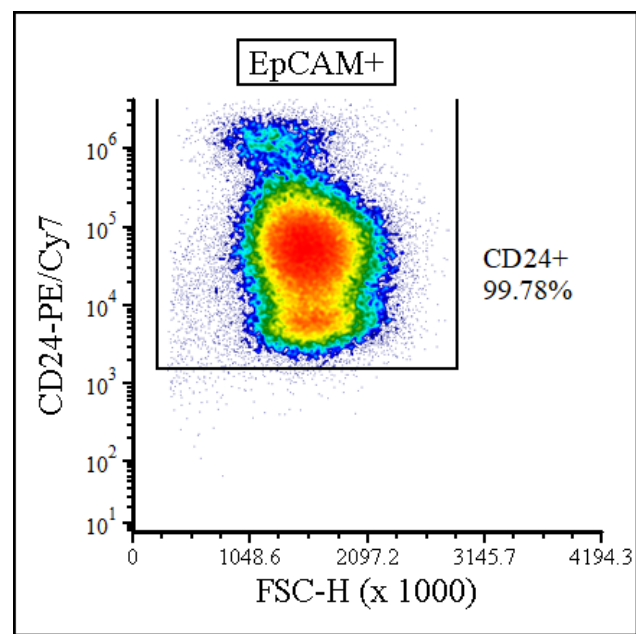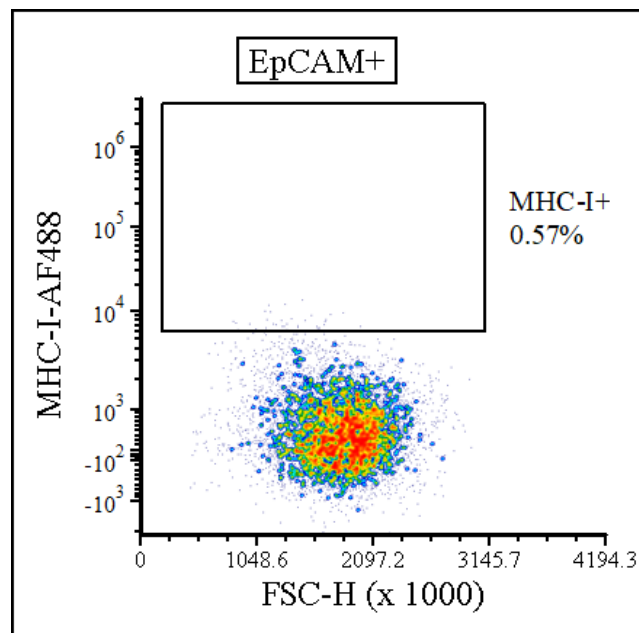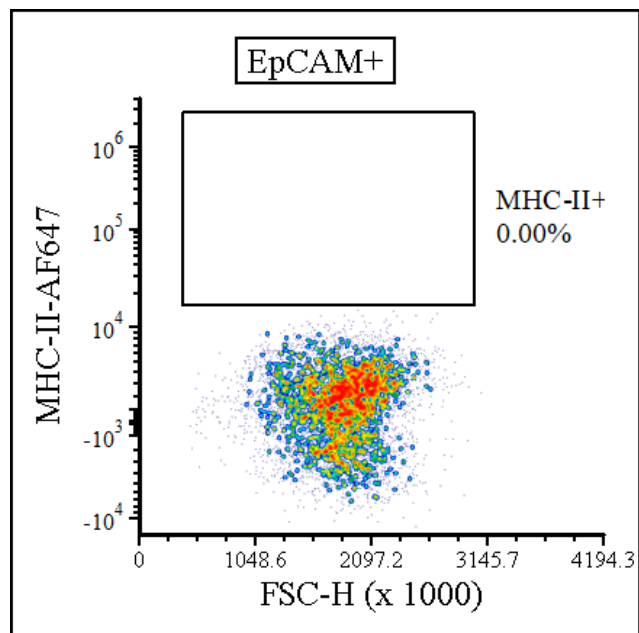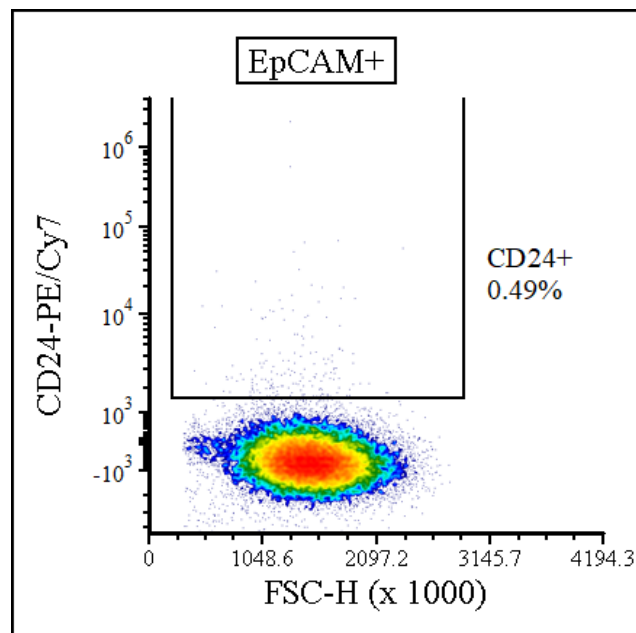

**Supplementary figure 1:**  
Cold digestion with dispase II does not remove MHC-I, MHC-II or CD24 from the surface of CD45-CD31-EpCAM+ cells.

Following debris exclusion (FSC/SSC), singlets gating (FSC-H/FSC-A), live cells gating (LIVE/DEAD fixable near-IR/FSC-H), CD45 and CD31 exclusion (CD45/CD31) and EpCAM+ gating (EpCAM/FSC-H) expression of MHC-I, MHC-II and CD24 was evaluated. Gating was based on fluorescence minus one (FMO) controls.

FMOs

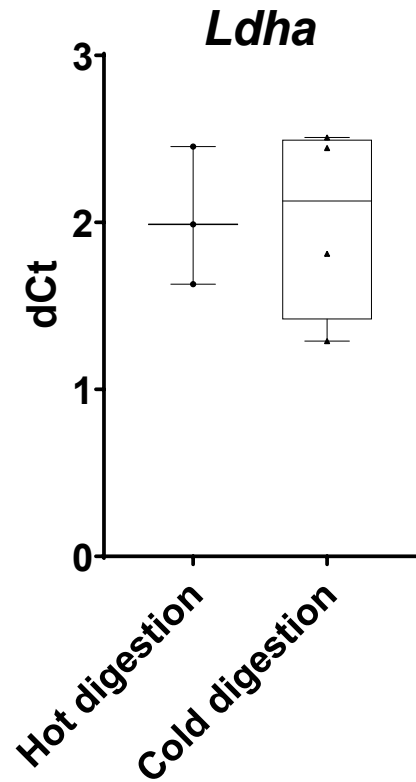

**Supplementary figure 2: Digestion type does not affect cellular oxidative stress based on LDHa (lactate dehydrogenase) levels.**

Following either hot or cold digestion CD45-CD31-EpCAM+ cells were MACS sorted and RNA isolated using Trizol and chloroform-based RNA isolation. SYBR green qPCR was performed, with Rpl37a as endogenous control. N=3-4

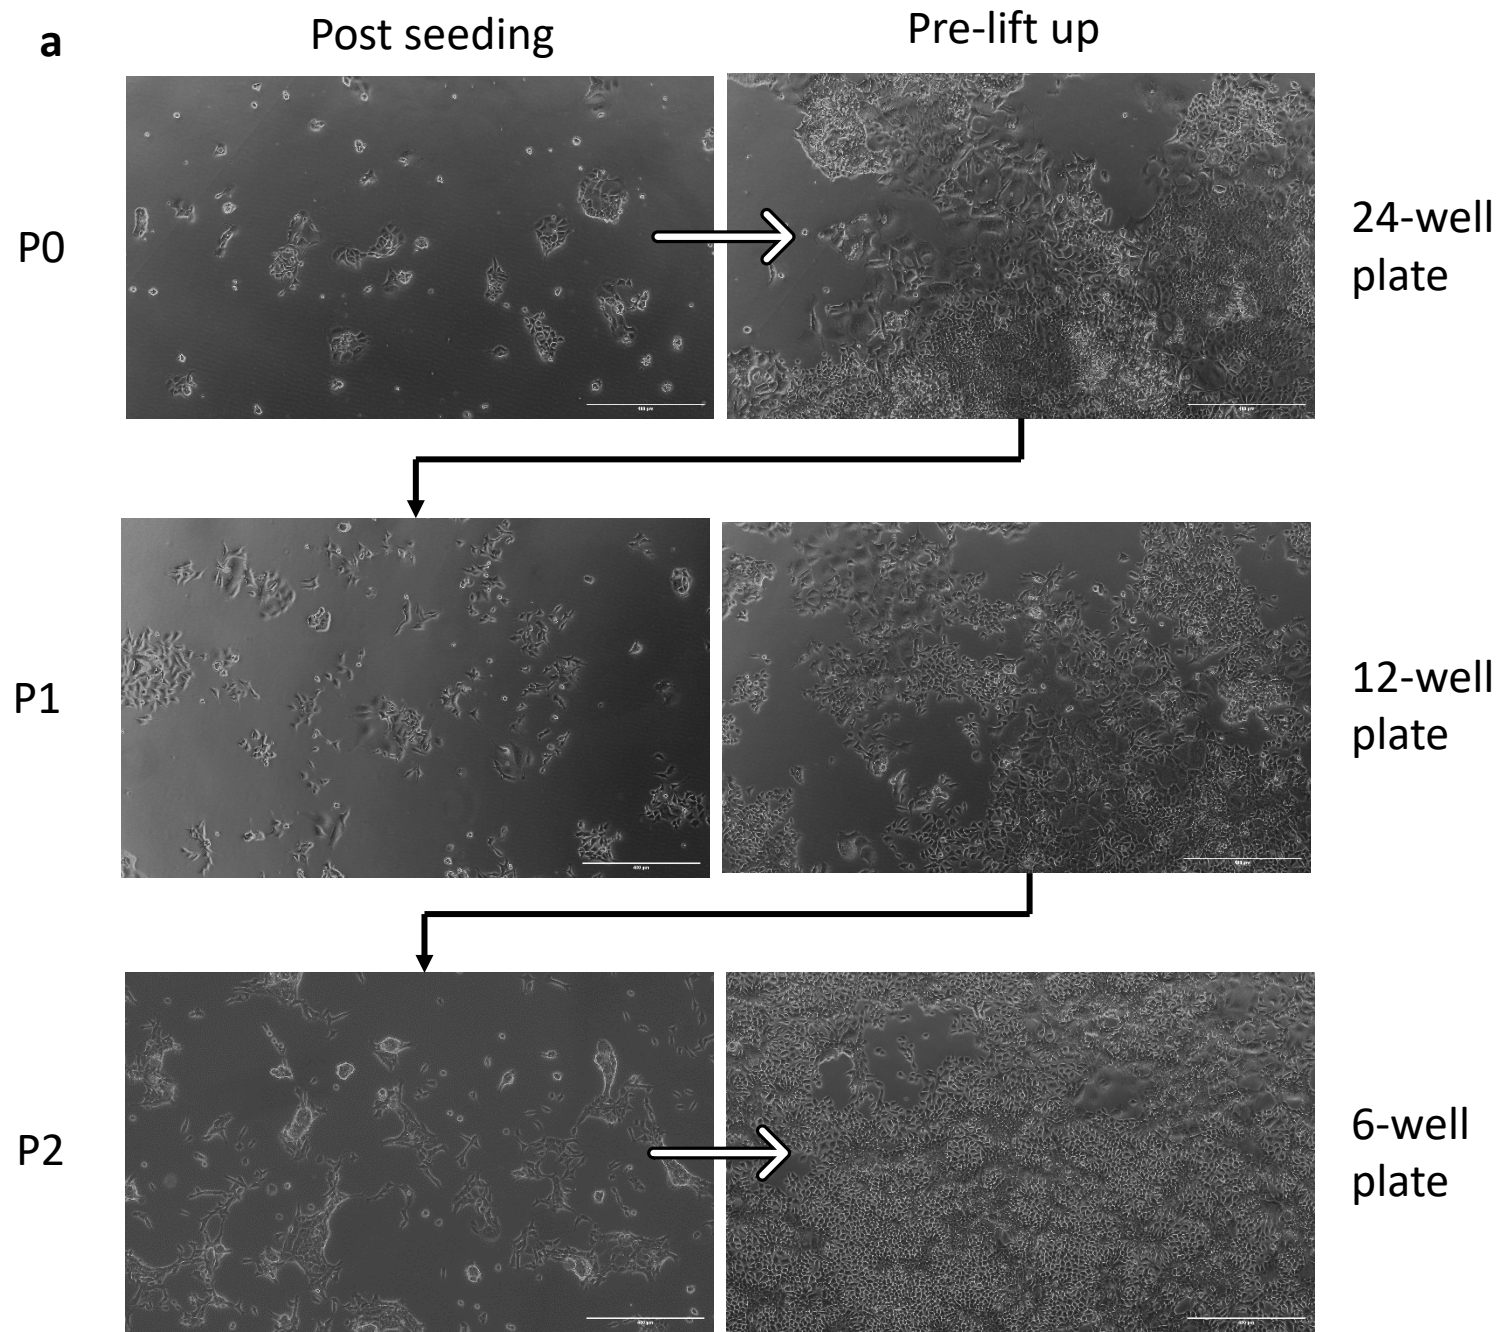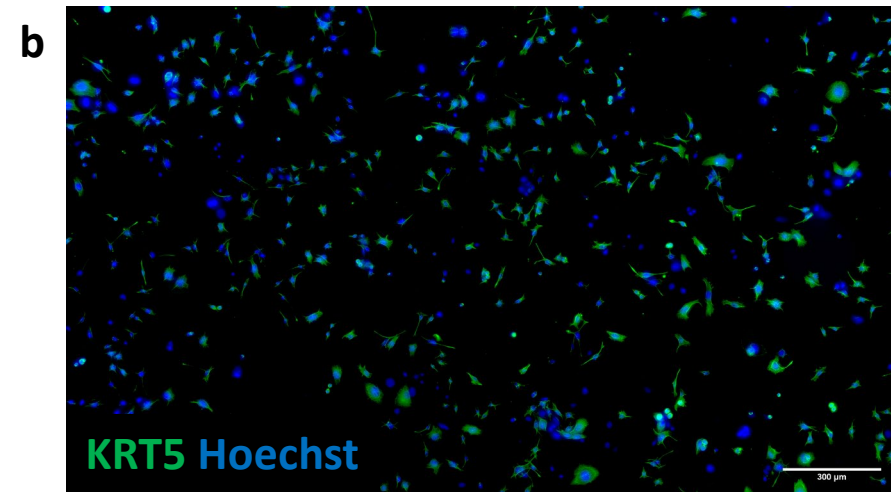

**Supplementary figure 3: Murine AECs can be passaged (P0-2) following cold digestion and CD45-CD31-EpCAM+ MACS sorting.**

(a) Following cold digestion, murine AECs (CD34<sup>-</sup>CD31<sup>-</sup>EpCAM<sup>+</sup>) were MACS sorted and  $2 \times 10^5$  cells were seeded into a 24-well plate and cultured in a Stemcell PneumaCult Ex-Plus medium with 10  $\mu$ M Y27632, 3  $\mu$ M CHIR99021, 1  $\mu$ M A8301, 5  $\mu$ g/ml heparin and 50 ng/ml FGF-10 for 14 days. Cells were passaged twice. Each time cells were detached using TrypLE and split 1:10 into a larger well plate starting from 24-well plate (P0), followed by 12-well plate (P1) and lastly a 6-well plate (P2). Once cells reached confluency at the end of passage 2, cells were lifted-up using TrypLE and  $1.4 \times 10^6$  live cells (trypan blue exclusion) were counted using haemocytometer. Six 10x objective phase-contrast single fields of view (3x2) were stitched together. Scale bar 400  $\mu$ m. N>2. (b) All cells express KRT5 (green) after three passages of CD45-CD31-EpCAM<sup>+</sup> MACS sorted AECs. Scale bar, 300  $\mu$ m.
